# Supplementary material
Source: PubMed Central journal article supplement (PMC2042201)
Supplement: pnas_0707155104_1.pdf [file pnas_0707155104_1.pdf]

FPA hardware loaded with top chamber containing either RNA/protein fixative  
OR additional LB media

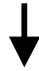

Flight FPA group delivered to Space Shuttle and ground FPA group  
delivered to OES room in SLSL



Space Shuttle launched and all FPA hardware identically activated at 9 days post-launch

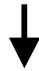

At 25 hours post-activation, all FPA cultures for RNA/protein analysis are fixed and all  
FPA cultures for virulence studies are supplemented with additional LB media



Space Shuttle lands on day 12 post-launch and at 2.5 hours post-landing,  
flight FPA hardware recovered from Space Shuttle

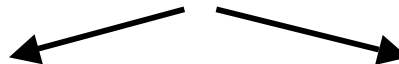

Flight and ground FPA  
cultures containing  
RNA/protein fixative are  
unloaded and frozen at -80 C

Flight and ground FPA  
cultures for virulence studies  
are unloaded and used in  
murine infection model
