# Supplementary material
Source: PubMed Central journal article supplement (PMC2042201)
Supplement: pnas_0707155104_4.pdf [file pnas_0707155104_4.pdf]

**Table 2. *Salmonella typhimurium* genes differentially-regulated during spaceflight mission STS-115**

**UP-regulated**

| <u>Gene number</u>        | <u>Fold change</u> | <u>Gene name</u> | <u>Known or putative function</u>                                          |
|---------------------------|--------------------|------------------|----------------------------------------------------------------------------|
| <u>Secreted proteins:</u> |                    |                  |                                                                            |
| STM1959                   | 2.10               | fliC             | flagellar biosynthesis; flagellin, filament structural protein             |
| STM2066                   | 2.31               | sopA             | Secreted effector protein of <i>Salmonella dublin</i>                      |
| STM2883                   | 2.57               | sipD             | cell invasion protein                                                      |
| STM2884                   | 6.28               | sipC             | cell invasion protein                                                      |
| <u>Membrane proteins:</u> |                    |                  |                                                                            |
| STM0374                   | 2.04               | yaiV             | putative inner membrane protein                                            |
| STM1070                   | 2.05               | ompA             | putative hydrogenase, membrane component                                   |
| STM1572                   | 3.34               | ompD             | outer membrane protein; bacterial porin                                    |
| STM2267                   | 2.44               | ompC             | outer membrane protein 1b (ib;c), porin                                    |
| STM3420                   | 3.12               | secY             | preprotein translocase of IISP family, putative membrane ATPase            |
| <u>Other function:</u>    |                    |                  |                                                                            |
| STM0152                   | 2.18               | aceE             | pyruvate dehydrogenase, decarboxylase component                            |
| STM0182                   | 2.21               | panB             | 3-methyl-2-oxobutanoate hydroxymethyltransferase                           |
| STM0240                   | 2.02               | yaeJ             | putative-tRNA hydrolase domain                                             |
| STM0272                   | 2.36               |                  | putative ATPase with chaperone activity; homologue of <i>Yersinia clpB</i> |
| STM0596                   | 2.24               | entE             | 2,3-dihydroxybenzoate-AMP ligase                                           |
| STM0730                   | 4.75               | gltA             | citrate synthase                                                           |
| STM1040                   | 2.12               |                  | Gifsy-2 prophage; probable minor tail protein                              |
| STM1290                   | 7.67               | gapA             | glyceraldehyde-3-phosphate dehydrogenase A                                 |
| STM1749                   | 4.76               | adhE             | iron-dependent alcohol dehydrogenase of <i>AdhE</i>                        |
| STM2106                   | 2.07               | wcaI             | putative glycosyl transferase in colanic acid biosynthesis                 |
| STM2118                   | 2.30               | wza              | putative polysaccharide export protein, outer membrane                     |
| STM2181                   | 2.06               | yohJ             | putative effector of murein hydrolase <i>LrgA</i>                          |
| STM2282                   | 2.58               | glpQ             | glycerophosphodiester phosphodiesterase, periplasmic                       |
| STM2314                   | 2.58               |                  | putative chemotaxis signal transduction protein                            |
| STM2708                   | 2.03               |                  | Fels-2 prophage: similar to tail fiber protein (gpI) in phage P2           |
| STM2719                   | 2.12               |                  | Fels-2 prophage: similar to gpR in phage 186                               |
| STM2843                   | 2.03               | hydN             | electron transport protein (FeS sender) from formate to hydrogen           |
| STM2846                   | 2.26               | hycH             | processing of <i>HycE</i> (part of the FHL complex)                        |
| STM2855                   | 3.25               | hypB             | hydrogenase-3 accessory protein, assembly of metallocenter                 |
| STM4311                   | 3.58               | tnpA             | IS200 transposase                                                          |
| STM4325                   | 6.39               | dcuA             | Dcu family, anaerobic dicarboxylate transport protein                      |
| STM4415                   | 2.71               | fbp              | fructose-bisphosphatase                                                    |
| STM4466                   | 4.07               |                  | putative carbamate kinase                                                  |
| SSL_2286                  | 2.97               | orf36            | putative phage replicase                                                   |

Putative, unknown function:

|           |      |                              |
|-----------|------|------------------------------|
| STM0289   | 2.08 | putative cytoplasmic protein |
| STM0699   | 2.76 | putative cytoplasmic protein |
| STM2744   | 2.44 | putative cytoplasmic protein |
| STM3752   | 2.05 | putative cytoplasmic protein |
| SSL_T1747 | 4.06 | putative cytoplasmic protein |

Plasmid genes:

Plasmid 1 (pSLT):

|         |      |      |                                                                        |
|---------|------|------|------------------------------------------------------------------------|
| PSLT011 | 2.20 | srgA | sdiA-regulated gene; putative thiol-disulfide isomerase or thioredoxin |
| PSLT015 | 4.44 | orf5 | putative outer membrane protein                                        |
| PSLT039 | 2.21 | spvB | Salmonella plasmid virulence: hydrophilic protein                      |
| PSLT043 | 4.21 |      | putative phosphoribulokinase / uridine kinase family                   |
| PSLT044 | 4.43 |      | putative integrase protein                                             |
| PSLT054 | 2.37 | samB | mutagenesis by UV and mutagens; related to umuDC operon                |
| PSLT068 | 2.04 |      | putative ParB-like nuclease domain                                     |
| PSLT072 | 2.11 |      | putative transglycosylase                                              |
| PSLT081 | 4.71 | traB | conjugative transfer: assembly                                         |
| PSLT095 | 4.24 | traN | conjugative transfer: aggregate stability                              |
| PSLT099 | 2.32 | trbB | conjugative transfer                                                   |
| PSLT100 | 2.59 | traH | conjugative transfer: assembly                                         |
| PSLT101 | 2.20 | traG | conjugative transfer: assembly abd aggregate stability                 |
| PSLT104 | 2.87 | traD | conjugative transfer: DNA transport                                    |
| PSLT110 | 2.37 | traX | conjugative transfer: fimbrial acetylation                             |

Plasmid 2:

|         |      |       |                      |
|---------|------|-------|----------------------|
| SSL_36  | 2.02 | colIb | colicin Ib protein   |
| SSL_T3  | 2.68 | trbC  | conjugative transfer |
| SSL_T5  | 3.14 | trbA  | conjugative transfer |
| SSL_T12 | 2.34 | traT  | conjugative transfer |
| SSL_T20 | 2.91 | traK  | conjugative transfer |
| SSL_T24 | 2.10 | traF  | conjugative transfer |
| SSL_T35 | 3.03 | pilL  | lipoprotein          |
| SSL_T45 | 2.32 | yagA  | unknown function     |
| SSL_T52 | 2.17 | stbA  | plasmid stability    |
| SSL_T53 | 5.31 | orf05 | unknown function     |
| SSL_T66 | 2.93 | ygbA  | unknown function     |

Plasmid 3:

|          |      |       |                         |
|----------|------|-------|-------------------------|
| SSL_T69  | 2.39 | tnpB  | putative transposase    |
| SSL_T70  | 14.1 | strB  | streptomycin resistance |
| SSL_T71  | 3.55 | strA  | streptomycin resistance |
| SSL_T72  | 7.43 | sulII | sulphonamide resistance |
| SSL_5085 | 2.08 | repA  | plasmid replication     |

## DOWN-regulated

### Protein secretion:

|         |       |      |                                                        |
|---------|-------|------|--------------------------------------------------------|
| STM1153 | 0.342 | msyB | suppresses protein export mutants                      |
| STM2895 | 0.417 | invB | surface presentation of antigens; secretory proteins   |
| STM3293 | 0.432 | secG | preprotein translocase IISPF family                    |
| STM3701 | 0.473 | secB | molecular chaperone in protein export                  |
| STM3974 | 0.445 | tatB | component of Sec-independent protein secretion pathway |
| STM4147 | 0.392 | secE | preprotein translocase IISPF family, membrane subunit  |

### Flagella:

|         |       |      |                                                              |
|---------|-------|------|--------------------------------------------------------------|
| STM1916 | 0.458 | cheY | chemotaxis regulator, transmits signals to flagellar motor   |
| STM1925 | 0.356 | flhD | regulator of flagellar biosynthesis, acts on class 2 operons |
| STM1962 | 0.443 | fliT | flagellar biosynthesis; possible export chaperone for FliD   |

### Fimbrial:

|         |       |      |                                      |
|---------|-------|------|--------------------------------------|
| STM0543 | 0.434 | fimA | major type 1 subunit fimbrin (pilin) |
|---------|-------|------|--------------------------------------|

### Stress proteins:

|         |       |      |                                     |
|---------|-------|------|-------------------------------------|
| STM0831 | 0.273 | dps  | stress response DNA-binding protein |
| STM1652 | 0.200 | ynaF | putative universal stress protein   |

### Regulatory:

|          |       |      |                                                                     |
|----------|-------|------|---------------------------------------------------------------------|
| STM_sRNA | 0.458 | RFN  | putative small regulatory RNA                                       |
| STM_sRNA | 0.499 | rne5 | putative small regulatory RNA                                       |
| STM_sRNA | 0.318 | csrB | regulatory RNA                                                      |
| STM0473  | 0.389 | hha  | hemolysin expression modulating protein                             |
| STM0606  | 0.493 | ybdO | putative transcriptional regulator, LysR family                     |
| STM0959  | 0.415 | lrp  | regulator for lrp regulon (AsnC family)                             |
| STM1444  | 0.391 | slyA | transcriptional regulator for hemolysin (MarR family)               |
| STM1660  | 0.494 | fnr  | transcriptional regulator                                           |
| STM2640  | 0.402 | rpoE | sigma E (sigma 24 ) factor of RNA polymerase                        |
| STM3466  | 0.438 | crp  | catabolite activator protein (CAP), cyclic AMP protein (CRP family) |
| STM4315  | 0.445 | rtsA | AraC-type DNA-binding domain-containing protein                     |
| STM4361  | 0.298 | hfq  | host factor I for bacteriophage Q beta replication                  |

### Ribosomal:

|         |       |       |                                                            |
|---------|-------|-------|------------------------------------------------------------|
| STM0216 | 0.344 | rpsB  | 30S ribosomal subunit protein S2                           |
| STM0469 | 0.474 | rpmE2 | putative 50S ribosomal protein L31 (second copy)           |
| STM2675 | 0.356 | rimM  | 16S rRNA processing protein                                |
| STM3345 | 0.310 | rplM  | 50S ribosomal subunit protein L13                          |
| STM3425 | 0.403 | rplF  | 50S ribosomal subunit protein L6                           |
| STM3428 | 0.438 | rplE  | 50S ribosomal subunit protein L5                           |
| STM3430 | 0.182 | rplN  | 50S ribosomal subunit protein L14                          |
| STM3433 | 0.422 | rplP  | 50S ribosomal subunit protein L16                          |
| STM3436 | 0.289 | rpsS  | 30S ribosomal subunit protein S19                          |
| STM3438 | 0.457 | rplW  | 50S ribosomal subunit protein L23                          |
| STM3439 | 0.393 | rplD  | 50S ribosomal subunit protein L4, regulates S10 expression |

|         |       |      |                                                        |
|---------|-------|------|--------------------------------------------------------|
| STM3448 | 0.250 | rpsL | 30S ribosomal subunit protein S12                      |
| STM4150 | 0.423 | rplA | 50S ribosomal subunit protein L1, regulates L1 and L11 |
| STM4391 | 0.401 | rpsF | 30S ribosomal subunit protein S6                       |

Membrane/periplasmic proteins:

|         |       |      |                                                |
|---------|-------|------|------------------------------------------------|
| STM1164 | 0.340 | yceB | putative outer membrane lipoprotein            |
| STM1249 | 0.443 |      | putative periplasmic protein                   |
| STM1432 | 0.464 | ydhO | putative cell wall-associated hydrolase        |
| STM1460 | 0.408 | ydgK | putative inner membrane protein                |
| STM1732 | 0.276 | ompW | outer membrane protein W; colicin S4 receptor  |
| STM1798 | 0.471 | ycgR | putative inner membrane protein                |
| STM2505 | 0.410 |      | putative inner membrane protein                |
| STM2685 | 0.411 | smpA | small membrane protein A                       |
| STM2802 | 0.453 | ygaM | putative inner membrane protein                |
| STM2870 | 0.462 |      | putative inner membrane protein                |
| STM3107 | 0.460 | yggN | putative periplasmic protein                   |
| STM3228 | 0.378 | yqjC | putative periplasmic protein                   |
| STM3229 | 0.485 | yqjD | putative inner membrane protein                |
| STM3231 | 0.457 | yqjK | putative inner membrane protein                |
| STM3347 | 0.393 | yhcB | putative periplasmic protein                   |
| STM4378 | 0.328 | yjfN | putative inner membrane protein                |
| STM4561 | 0.319 | osmY | hyperosmotically inducible periplasmic protein |

Other function:

|         |       |      |                                                               |
|---------|-------|------|---------------------------------------------------------------|
| STM0186 | 0.406 | dksA | dnaK suppressor protein                                       |
| STM0368 | 0.386 | prpB | putative carboxyphosphoenolpyruvate mutase                    |
| STM0369 | 0.403 | prpC | putative citrate synthase                                     |
| STM0417 | 0.382 | ribH | riboflavin synthase, beta chain                               |
| STM0536 | 0.483 | ppiB | peptidyl-prolyl cis-trans isomerase B (rotamase B)            |
| STM0665 | 0.480 | gltI | ABC superfamily (bind_prot), glutamate/aspartate transporter  |
| STM0759 | 0.492 | ybgS | putative homeobox protein                                     |
| STM0803 | 0.408 | moaB | molybdopterin biosynthesis, protein B                         |
| STM0966 | 0.497 | dmsC | anaerobic dimethyl sulfoxide reductase, subunit C             |
| STM1196 | 0.336 | acpP | acyl carrier protein                                          |
| STM1291 | 0.474 | yeaA | putative peptide methionine sulfoxide reductase               |
| STM1569 | 0.458 | fdnH | formate dehydrogenase-N, Fe-S beta subunit, nitrate-inducible |
| STM1783 | 0.478 | pth  | peptidyl-tRNA hydrolase                                       |
| STM2488 | 0.436 | nlpB | lipoprotein-34                                                |
| STM2542 | 0.495 | nifU | NifU homologs involved in Fe-S cluster formation              |
| STM2549 | 0.460 | asrB | anaerobic sulfide reductase                                   |
| STM2646 | 0.294 | yfiD | putative formate acetyltransferase                            |
| STM2746 | 0.344 |      | putative Excinuclease ATPase subunit                          |
| STM2767 | 0.491 |      | putative Superfamily I DNA and RNA helicase                   |
| STM3039 | 0.455 | idi  | isopentenylidiphosphate isomerase                             |
| STM3054 | 0.431 | gcvH | glycine cleavage complex protein H                            |
| STM3241 | 0.458 | tdcE | pyruvate formate-lyase 4/ 2-ketobutyrate formate-lyase        |
| STM3443 | 0.404 | bfr  | bacterioferrin, an iron storage homoprotein                   |
| STM3702 | 0.453 | grxC | glutaredoxin 3                                                |

|         |       |      |                                                            |
|---------|-------|------|------------------------------------------------------------|
| STM3703 | 0.321 | yibN | putative Rhodanese-related sulfurtransferases              |
| STM3870 | 0.484 | atpE | membrane-bound ATP synthase, F0 sector, subunit c          |
| STM3915 | 0.492 | trxA | thioredoxin 1, redox factor                                |
| STM4341 | 0.411 | frdC | fumarate reductase, anaerobic, membrane anchor polypeptide |
| STM4414 | 0.475 | ppa  | inorganic pyrophosphatase                                  |

Putative ORF, unknown function:

|         |       |      |                                              |
|---------|-------|------|----------------------------------------------|
| STM0474 | 0.435 | ybaJ | putative cytoplasmic protein                 |
| STM1367 | 0.378 | ydiH | putative cytoplasmic protein                 |
| STM1583 | 0.441 |      | putative cytoplasmic protein                 |
| STM2390 | 0.290 | yfcZ | putative cytoplasmic protein                 |
| STM2801 | 0.451 | ygaC | putative cytoplasmic protein                 |
| STM3461 | 0.493 |      | putative cytoplasmic protein                 |
| STM3654 | 0.341 |      | pseudogene; in-frame stop following codon 23 |
| STM3995 | 0.459 | yihD | putative cytoplasmic protein                 |
| STM4002 | 0.172 |      | putative cytoplasmic protein                 |
| STM4088 | 0.357 | yiiU | putative cytoplasmic protein                 |
| STM4239 | 0.334 |      | putative cytoplasmic protein                 |
| STM4240 | 0.411 | yjbJ | putative cytoplasmic protein                 |
| STM4250 | 0.422 | yjbQ | putative cytoplasmic protein                 |
| STM4499 | 0.494 | yeeN | putative cytoplasmic protein                 |
