# Supplementary material
Source: PubMed Central journal article supplement (PMC2042201)
Supplement: pnas_0707155104_5.pdf [file pnas_0707155104_5.pdf]

| <b>Table 3. <i>Salmonella typhimurium</i> proteins identified in flight and ground total cell samples from STS-115 using MudPIT analysis (251 proteins total)</b> |                         |                                           |                                                  |                                                  |
|-------------------------------------------------------------------------------------------------------------------------------------------------------------------|-------------------------|-------------------------------------------|--------------------------------------------------|--------------------------------------------------|
| <b>Protein name</b>                                                                                                                                               | <b>Accession number</b> | <b>Protein molecular weight (Daltons)</b> | <b>Ground total cell protein ID probability*</b> | <b>Flight total cell protein ID probability*</b> |
| aspartate ammonia-lyase                                                                                                                                           | gi 16767575             | 52268.1                                   | 100%                                             | 100%                                             |
| translation elongation factor EF-Tu.A                                                                                                                             | gi 96718                | 43233.6                                   | 100%                                             | 100%                                             |
| elongation factor G                                                                                                                                               | gi 16766735             | 77582                                     | 100%                                             | 100%                                             |
| putative hydrogenase membrane component precursor                                                                                                                 | gi 16764429             | 37497.2                                   | 100%                                             | 100%                                             |
| GroEL protein                                                                                                                                                     | gi 16767579             | 57267.8                                   | 100%                                             | 100%                                             |
| 30S ribosomal protein S1                                                                                                                                          | gi 16764341             | 61154.4                                   | 100%                                             | 100%                                             |
| L-asparaginase                                                                                                                                                    | gi 16766407             | 36908.5                                   | 100%                                             | 100%                                             |
| phosphoenolpyruvate carboxykinase                                                                                                                                 | gi 16766788             | 59559.8                                   | 100%                                             | 100%                                             |
| enolase                                                                                                                                                           | gi 16766258             | 45468                                     | 100%                                             | 100%                                             |
| glyceraldehyde 3-phosphate dehydrogenase A                                                                                                                        | gi 16764641             | 35568.6                                   | 100%                                             | 100%                                             |
| periplasmic glycerophosphodiester phosphodiesterase                                                                                                               | gi 16765609             | 40407.8                                   | 100%                                             | 100%                                             |
| molecular chaperone DnaK                                                                                                                                          | gi 16763402             | 69241.2                                   | 100%                                             | 100%                                             |
| 30S ribosomal protein S3                                                                                                                                          | gi 16766723             | 25965.5                                   | 100%                                             | 100%                                             |
| formate acetyltransferase 1                                                                                                                                       | gi 16764333             | 84989.4                                   | 100%                                             | 100%                                             |
| 50S ribosomal subunit protein L7/L12                                                                                                                              | gi 16767406             | 12281                                     | 100%                                             | 100%                                             |
| ribosomal protein S7                                                                                                                                              | gi 16766736             | 17572.5                                   | 100%                                             | 100%                                             |
| histone like DNA-binding protein HU-alpha (NS2) (HU-2)                                                                                                            | gi 16767424             | 9503.1                                    | 100%                                             | 100%                                             |
| glycerol kinase                                                                                                                                                   | gi 16767352             | 56046.2                                   | 100%                                             | 100%                                             |
| dihydrodipicolinate dehydrogenase                                                                                                                                 | gi 16763544             | 50621.8                                   | 100%                                             | 100%                                             |
| sn-glycerol-3-phosphate dehydrogenase                                                                                                                             | gi 16766813             | 56908.5                                   | 100%                                             | 100%                                             |
| trigger factor                                                                                                                                                    | gi 16763828             | 48048.1                                   | 100%                                             | 100%                                             |
| cold shock protein                                                                                                                                                | gi 16765178             | 7384.3                                    | 100%                                             | 100%                                             |
| DNA-binding protein HLP-II                                                                                                                                        | gi 16765095             | 15525                                     | 100%                                             | 100%                                             |
| ATP synthase beta subunit                                                                                                                                         | gi 16767149             | 50265.5                                   | 100%                                             | 100%                                             |
| phosphoglycerate kinase                                                                                                                                           | gi 16766370             | 41115.1                                   | 100%                                             | 100%                                             |
| iron-dependent alcohol dehydrogenase AdhE                                                                                                                         | gi 16765093             | 96199.8                                   | 100%                                             | 100%                                             |
| 50S ribosomal subunit protein L1                                                                                                                                  | gi 16767404             | 24710.5                                   | 100%                                             | 100%                                             |
| 30S ribosomal protein S4                                                                                                                                          | gi 16766705             | 23467.7                                   | 100%                                             | 100%                                             |
| 50S ribosomal subunit protein L13                                                                                                                                 | gi 16766640             | 16000.7                                   | 100%                                             | 100%                                             |
| putative outer membrane porin precursor                                                                                                                           | gi 16764916             | 39662.7                                   | 99%                                              | 99%                                              |
| FKBP-type peptidyl-prolyl cis-trans isomerase                                                                                                                     | gi 16766742             | 28928.6                                   | 100%                                             | 100%                                             |
| transketolase 1 isozyme                                                                                                                                           | gi 16766377             | 72117                                     | 100%                                             | 100%                                             |
| 50S ribosomal subunit protein L5                                                                                                                                  | gi 16766717             | 20300.6                                   | 100%                                             | 100%                                             |
| DNA-directed RNA polymerase beta' subunit                                                                                                                         | gi 16767408             | 15522.0                                   | 100%                                             | 100%                                             |
| 30S ribosomal protein S13                                                                                                                                         | gi 16766707             | 13144.1                                   | 100%                                             | 100%                                             |
| alkyl hydroperoxide reductase C22 subunit                                                                                                                         | gi 16763985             | 20729.7                                   | 100%                                             | 100%                                             |
| 30S ribosomal subunit protein S5                                                                                                                                  | gi 16766712             | 17585                                     | 100%                                             | 100%                                             |
| 50S ribosomal protein L24                                                                                                                                         | gi 16766718             | 11298.3                                   | 100%                                             | 100%                                             |
| DNA protection during starvation protein                                                                                                                          | gi 16764193             | 18699.8                                   | 100%                                             | 100%                                             |
| ribosomal protein L19                                                                                                                                             | gi 16765988             | 13112                                     | 100%                                             | 100%                                             |
| acyl carrier protein                                                                                                                                              | gi 16764551             | 8621.4                                    | 100%                                             | 100%                                             |
| isocitrate dehydrogenase                                                                                                                                          | gi 16764593             | 45771                                     | 100%                                             | 93%                                              |
| triosephosphate isomerase                                                                                                                                         | gi 16767347             | 26899                                     | 100%                                             | 100%                                             |
| 50S ribosomal subunit protein L3                                                                                                                                  | gi 16766729             | 22228.7                                   | 100%                                             | 100%                                             |
| 30S ribosomal protein S2                                                                                                                                          | gi 16763606             | 26741.2                                   | 100%                                             | 100%                                             |
| lysine decarboxylase                                                                                                                                              | gi 16765879             | 81220.5                                   | 100%                                             | 100%                                             |
| putative universal stress protein                                                                                                                                 | gi 16763991             | 15882.8                                   | 100%                                             | 100%                                             |
| putative thiol-alkyl hydroperoxide reductase                                                                                                                      | gi 16763782             | 22299                                     | 100%                                             | 100%                                             |
| 50S ribosomal protein L9                                                                                                                                          | gi 16767640             | 15765.8                                   | 100%                                             | 100%                                             |
| 50S ribosomal subunit protein L10                                                                                                                                 | gi 16767405             | 17782.8                                   | 100%                                             | 100%                                             |
| 30S ribosomal subunit protein S16                                                                                                                                 | gi 16765991             | 9216.7                                    | 100%                                             | 100%                                             |
| 50S ribosomal protein L20                                                                                                                                         | gi 16764687             | 13479.6                                   | 100%                                             | 100%                                             |
| pyruvate kinase                                                                                                                                                   | gi 16764728             | 50639.5                                   | 100%                                             | 98%                                              |
| 6-phosphogluconate dehydrogenase                                                                                                                                  | gi 16765411             | 51379.2                                   | 100%                                             | 93%                                              |
| inorganic pyrophosphatase                                                                                                                                         | gi 16767660             | 19658.8                                   | 100%                                             | 100%                                             |
| 50S ribosomal protein L4                                                                                                                                          | gi 16766728             | 22068.6                                   | 100%                                             | 100%                                             |
| 50S ribosomal protein L11                                                                                                                                         | gi 16767403             | 14857.5                                   | 100%                                             | 100%                                             |
| 50S ribosomal subunit protein L17                                                                                                                                 | gi 16766703             | 14377.2                                   | 100%                                             | 100%                                             |

|                                                        |              |          |      |      |
|--------------------------------------------------------|--------------|----------|------|------|
| succinyl-CoA synthetase beta chain                     | gij 16764108 | 41462.8  | 100% | 100% |
| 50S ribosomal subunit protein L6                       | gij 16766714 | 18841.3  | 100% | 100% |
| fructose 1,6-bisphosphate aldolase                     | gij 16766369 | 39138.4  | 100% | 100% |
| aconitate hydratase 2                                  | gij 16763548 | 93513.7  | 100% | 100% |
| iron superoxide dismutase                              | gij 16764779 | 21290.4  | 100% | 100% |
| 50S ribosomal protein L22                              | gij 16766724 | 12208.6  | 100% | 100% |
| sn-glycerol-3-phosphate dehydrogenase large subunit    | gij 16765611 | 59039.6  | 100% | 100% |
| RNA polymerase, alpha subunit                          | gij 16766704 | 36494.1  | 100% | 100% |
| 30S ribosomal protein S10                              | gij 16766730 | 11748.8  | 100% | 100% |
| RNA polymerase, beta subunit                           | gij 16767407 | 150586.6 | 100% | 99%  |
| polynucleotide phosphorylase                           | gij 16766580 | 77020.9  | 100% | 100% |
| Lpp1 murein lipoprotein                                | gij 16764727 | 8373.6   | 100% | 93%  |
| malate dehydrogenase                                   | gij 16766654 | 32457.8  | 100% | 100% |
| citrate synthase                                       | gij 16764100 | 48089.9  | 100% | 100% |
| GroES protein                                          | gij 16767578 | 10300.1  | 100% | 100% |
| putative glutamic dehydrogenase-like protein           | gij 16765136 | 48020.6  | 100% | 100% |
| succinyl-CoA synthetase alpha subunit                  | gij 16764109 | 29757.8  | 99%  | 100% |
| transaldolase B                                        | gij 16763397 | 35154.5  | 100% | 100% |
| glycine dehydrogenase                                  | gij 16766354 | 104270.1 | 93%  | 100% |
| transcription elongation factor NusA                   | gij 16766585 | 55408.3  | 100% | 100% |
| flagellar biosynthesis filament structural protein     | gij 16766083 | 52518.5  | 100% | 100% |
| elongation factor Ts                                   | gij 16763607 | 30339.6  | 100% | 100% |
| N-acetylneuraminatase lyase                            | gij 16766634 | 32437.7  | 100% | 100% |
| 50S ribosomal subunit protein L32                      | gij 16764546 | 6428.4   | 100% | 100% |
| ATP synthase alpha subunit                             | gij 16767151 | 5509.6   | 100% | 97%  |
| 50S ribosomal subunit protein L14                      | gij 16766719 | 13550.2  | 99%  | 100% |
| phosphate acetyltransferase                            | gij 16765792 | 82305.8  | 100% | 100% |
| 50S ribosomal subunit protein L15                      | gij 16766710 | 14948.9  | 100% | 100% |
| ribose-phosphate pyrophosphokinase                     | gij 16765121 | 34198.6  | 100% | 88%  |
| hydrogenase-2 large subunit                            | gij 16766447 | 62420.6  | 100% | 100% |
| cytoplasmic ferritin                                   | gij 16765276 | 19262.5  | 100% | 100% |
| riboflavin synthase subunit beta                       | gij 16763797 | 15990.5  | 100% | 97%  |
| 50S ribosomal subunit protein L29                      | gij 16766721 | 7242.6   | 100% | 93%  |
| putative universal stress protein                      | gij 16764996 | 15696.7  | 93%  | 100% |
| periplasmic nitrate reductase                          | gij 16765587 | 92856.9  | 100% | 93%  |
| hyperosmotically-inducible periplasmic protein         | gij 16767802 | 21430.3  | 93%  | 93%  |
| ornithine carbamoyltransferase                         | gij 16767710 | 36798.4  | 100% | 100% |
| 30S ribosomal protein S11                              | gij 16766706 | 13812.8  | 100% | 100% |
| formate dehydrogenase alpha subunit                    | gij 16767302 | 112357.4 | 100% | 100% |
| nucleoside diphosphate kinase (ndk)                    | gij 16765846 | 15503.7  | 100% | 100% |
| putative pyruvate-flavodoxin oxidoreductase            | gij 16764995 | 128563.7 | 55%  | 100% |
| glycoprotein/polysaccharide metabolism protein         | gij 16763846 | 19458.9  | 100% | 100% |
| O-acetyl serine sulfhydrylase                          | gij 11514514 | 34414.7  | 93%  | 100% |
| 30S ribosomal subunit protein S21                      | gij 16766509 | 8482.1   | 100% | 100% |
| ornithine decarboxylase isozyme                        | gij 16764071 | 82432.6  | 100% | 99%  |
| fumarate reductase                                     | gij 16767591 | 27157.3  | 100% | 100% |
| anaerobic glycerol-3-phosphate dehydrogenase subunit B | gij 16765612 | 45653.3  | 100% | 100% |
| glucose-specific PTS system enzyme IIA component       | gij 16765753 | 18229.5  | 100% | 100% |
| DNA-directed RNA polymerase omega subunit              | gij 16767026 | 10218.3  | 100% | 100% |
| FKBP-type peptidyl-prolyl cis-trans isomerase          | gij 16766744 | 20767.9  | 100% | 100% |
| pyruvate dehydrogenase E1 component                    | gij 16763542 | 99564    | 100% | 97%  |
| phosphate acetyltransferase                            | gij 16765665 | 77261.1  | 100% | 93%  |
| glucose-6-phosphate isomerase                          | gij 16767471 | 61412.3  | 100% | 93%  |
| putative oxidase                                       | gij 16764715 | 113118.3 | 93%  | 99%  |
| 50S ribosomal subunit protein L16                      | gij 16766722 | 15176.6  | 100% | 100% |
| enterobactin synthetase component F                    | gij 16763965 | 141727.2 | 78%  | 99%  |
| 50S ribosomal subunit protein L2                       | gij 16766726 | 29802.2  | 93%  | 100% |
| acetyl-coenzyme A carboxylase subunit alpha            | gij 16763622 | 35327.3  | 100% | 59%  |
| pyruvate kinase                                        | gij 16765230 | 51369.5  | 100% | 93%  |
| serine hydroxymethyltransferase                        | gij 16765875 | 45437    | 100% | 93%  |
| 50S ribosomal subunit protein L28                      | gij 16767013 | 9032.6   | 93%  | 93%  |
| isoaspartyl dipeptidase                                | gij 16767756 | 40306.8  | 100% | 93%  |
| sensory histidine kinase                               | gij 16765598 | 106264.3 | 100% | 79%  |
| putative inner membrane lipoprotein                    | gij 16765852 | 179631.1 | 87%  | 87%  |
| Initiation factor IF-3                                 | gij 16419853 | 16619.9  | 100% | 100% |

|                                                       |                |          |      |      |
|-------------------------------------------------------|----------------|----------|------|------|
| putative protease                                     | gij 16764427   | 65586.3  | 99%  | 97%  |
| thiosulfate reductase electron transport protein PhsB | gij 16765394   | 21300.7  | 93%  | 100% |
| dihydrolipoamide acetyltransferase                    | gij 16764107   | 43839.8  | 100% | 100% |
| protein-export protein SecB                           | gij 16766986   | 17227    | 100% | 100% |
| cytochrome d terminal oxidase polypeptide subunit I   | gij 16764110   | 58299.5  | 100% | 100% |
| putative detox protein in ethanolamine utilization    | gij 16765785   | 9824.4   | 100% | 100% |
| galactose transport protein                           | gij 16765520   | 35796.1  | 100% | 99%  |
| putative translation initiation inhibitor             | gij 16767703   | 13557.2  | 100% | 93%  |
| dihydrolipoamide acetyltransferase                    | gij 16763543   | 66121.5  | 100% | 93%  |
| glutamine ABC transporter periplasmic-binding protein | gij 16764192   | 27245.6  | 93%  | 93%  |
| putative selenocysteine synthase                      | gij 16767692   | 39874.5  | 47%  | 93%  |
| 30S ribosomal protein S20                             | gij 16763433   | 9637.9   | 100% | 93%  |
| NADH dehydrogenase I chain G                          | gij 16420864   | 100254.5 | 100% | 100% |
| acetyl-CoA carboxylase                                | gij 16766675   | 49245.8  | 99%  | 100% |
| RNase E                                               | gij 16764541   | 119381.7 | 100% | 100% |
| fructose-1,6-bisphosphatase                           | gij 16767661   | 36781.5  | 100% | 100% |
| phosphoenolpyruvate synthase                          | gij 16764700   | 87191.6  | 100% | 100% |
| putative formate acetyltransferase                    | gij 16765966   | 14326.2  | 100% | 93%  |
| lipoprotein                                           | gij 16765808   | 36919.8  | 100% | 93%  |
| sensory transduction histidine kinase                 | gij 16764736   | 65221.8  | 93%  | 54%  |
| sensory kinase in two-component system with CreB      | gij 16767830   | 51666.7  | 93%  | 59%  |
| agmatinase                                            | gij 16766379   | 33585.5  | 100% | 100% |
| aminoacyl-histidine dipeptidase                       | gij 16763698   | 52419.9  | 93%  | 100% |
| 30S ribosomal subunit protein S19                     | gij 16766725   | 10398.5  | 100% | 93%  |
| glucose-1-phosphate adenyllyltransferase              | gij 16766822   | 48444.5  | 100% | 83%  |
| acetate kinase                                        | gij 16765664   | 43240.3  | 100% | 92%  |
| ABC superfamily peptide transport protein             | gij 16765039   | 30654.8  | 48%  | 100% |
| potassium-transporting ATPase subunit B               | gij 16764075   | 72125    | 99%  | 74%  |
| adenylosuccinate synthetase                           | gij 16767612   | 47359.7  | 100% | 100% |
| ATP synthase delta subunit                            | gij 16767152   | 19394.2  | 97%  | 100% |
| glycerol dehydrogenase                                | gij 16767374   | 38723.5  | 100% | 96%  |
| succinate dehydrogenase catalytic subunit             | gij 16764105   | 26847.2  | 100% | 93%  |
| FkbP-type peptidyl-prolyl cis-trans isomerase         | gij 16767643   | 23719.2  | 100% | 93%  |
| putative sigma(54) modulation protein                 | gij 16765980   | 12634.6  | 100% | 93%  |
| ATP synthase epsilon subunit                          | gij 16767148   | 15046.6  | 100% | 93%  |
| putative cytoplasmic protein                          | gij 16765717   | 10269.4  | 100% | 93%  |
| needle complex major subunit PrgI                     | gij 16766179   | 8839.3   | 93%  | 100% |
| cytochrome o ubiquinol oxidase subunit I              | gij 16763823   | 74265.7  | 93%  | 100% |
| fumarate reductase, flavoprotein subunit              | gij 16767592   | 65473.9  | 93%  | 100% |
| putative lipoprotein                                  | gij 16764058   | 12218.6  | 72%  | 96%  |
| phase 1 flagellin                                     | gij 16765297   | 51594.5  | 100% | 100% |
| transcription termination factor Rho                  | gij 16767192   | 46977.2  | 100% | 100% |
| arginine deiminase                                    | gij 16767712   | 45544.5  | 99%  | 100% |
| serine endoprotease                                   | gij 16766643   | 47310.1  | 93%  | 100% |
| putative fructose-1,6-bisphosphate aldolase           | gij 16767344   | 31725.2  | 93%  | 100% |
| NADH dehydrogenase I chain F                          | gij 16765651   | 49229.2  | 100% | 93%  |
| small membrane protein A                              | gij 16766000   | 12327    | 93%  | 100% |
| single-strand DNA-binding protein                     | gij 16767506   | 19055.5  | 93%  | 100% |
| aldehyde oxidoreductase                               | gij 3885918    | 49239.5  | 93%  | 100% |
| PilQ ATP-binding protein                              | gij 32470257   | 58267.7  | 98%  | 86%  |
| BipA GTPase                                           | gij 16767274   | 67359.4  | 100% | 66%  |
| TrpR binding protein Wrba                             | gij 16764477   | 20849.7  | 100% | 93%  |
| catalase HPII                                         | gij 16764669   | 83610.2  | 93%  | 100% |
| ethanolamine utilization protein EutL                 | gij 16765776   | 22678    | 100% | 81%  |
| nikB plasmid protein                                  | gij 20521580   | 103992.3 | 79%  | 100% |
| thioredoxin                                           | gij 16767191** | 11789.4  | 100% | 0    |
| aldose 1-epimerase                                    | gij 16764640   | 32541.6  | 100% | 0    |
| phosphopentomutase                                    | gij 16767810   | 44227.1  | 100% | 0    |
| D-ribose-binding protein                              | gij 1070661    | 28512.8  | 93%  | 0    |
| oriT nickase/helicase                                 | gij 16445291   | 191664   | 100% | 0    |
| DNA polymerase I                                      | gij 16767264   | 103114.9 | 93%  | 0    |
| ATPase subunit                                        | gij 7594817    | 46171.1  | 100% | 0    |
| phosphoglyceromutase                                  | gij 16766989   | 56237.5  | 100% | 0    |
| putative periplasmic protein                          | gij 16765796   | 38706.3  | 100% | 0    |
| inositol-5-monophosphate dehydrogenase                | gij 16765831   | 51930.1  | 100% | 0    |

|                                                             |                |          |      |      |
|-------------------------------------------------------------|----------------|----------|------|------|
| putative ATP-dependent helicase                             | gij 16765162   | 70268.1  | 93%  | 0    |
| hydrogenase 3 large subunit                                 | gij 16766155   | 65003.1  | 100% | 0    |
| mannose-specific enzyme IIAB                                | gij 16765171   | 34969.2  | 100% | 0    |
| 30s ribosomal protein S6                                    | gij 16767637** | 15154.9  | 100% | 0    |
| dipeptide transport protein                                 | gij 16766917   | 60202.5  | 100% | 0    |
| D-fructose-6-phosphate amidotransferase                     | gij 16767145   | 66860.7  | 100% | 0    |
| tetrathionate reductase subunit A (TtrA)                    | gij 16764733   | 110976.9 | 97%  | 0    |
| uridine phosphorylase                                       | gij 16422527   | 27205.9  | 100% | 0    |
| anaerobic dimethyl sulfoxide reductase chain B              | gij 16764326** | 22761.6  | 100% | 0    |
| virulence-associated protein mkfB                           | gij 7443056    | 62570.6  | 100% | 0    |
| prolyl-tRNA synthetase                                      | gij 16763631   | 63522.6  | 100% | 0    |
| cytosine deaminase                                          | gij 16766629   | 47608    | 100% | 0    |
| ribosome recycling factor                                   | gij 16763609   | 20538    | 100% | 0    |
| dihydrodipicolinate synthase                                | gij 16765809** | 31276.4  | 100% | 0    |
| putative dehydrogenase                                      | gij 16765715   | 77238.8  | 99%  | 0    |
| outer membrane-bound fatty acid transporter                 | gij 16765718   | 47688.5  | 93%  | 0    |
| putative cytoplasmic protein                                | gij 16763672** | 79560.5  | 99%  | 0    |
| 2-dehydro-3-deoxyphosphooctonate aldolase                   | gij 16765113   | 30777.4  | 93%  | 0    |
| periplasmic maltose-binding protein                         | gij 16767479   | 43468    | 100% | 0    |
| chemotactic response protein                                | gij 16765257** | 23902.4  | 100% | 0    |
| putative acetyltransferase                                  | gij 16765805   | 74000    | 100% | 0    |
| phosphoglucosamine mutase                                   | gij 16766590   | 47424.2  | 100% | 0    |
| ATP-dependent RNA helicase                                  | gij 16765963   | 50040.2  | 100% | 0    |
| glutamine synthetase                                        | gij 16767272   | 51768.7  | 100% | 0    |
| outer membrane protein Tsx                                  | gij 16763793   | 32761.5  | 100% | 0    |
| ribonuclease R (RNase R)                                    | gij 16767614   | 92033.1  | 99%  | 0    |
| DNA-binding protein HU-beta                                 | gij 16763832   | 9222     | 99%  | 0    |
| putative zinc-binding dehydrogenase                         | gij 16764887   | 37229    | 100% | 0    |
| transcriptional repressor for rbs operon (GalR/LacI family) | gij 16767170   | 36702.1  | 100% | 0    |
| ubiquinone/menaquinone methyltransferase UbiE               | gij 16767240   | 28118.9  | 100% | 0    |
| phosphoheptose isomerase                                    | gij 16763693   | 20878.5  | 100% | 0    |
| ClpB ATP-dependent protease                                 | gij 16765976   | 95421.8  | 99%  | 0    |
| putative pyrophosphatase                                    | gij 16766260   | 30812.9  | 99%  | 0    |
| putative GTP-binding protein                                | gij 16766597   | 43086.7  | 99%  | 0    |
| putative 5'-nucleotidase/2',3'-cyclic phosphodiesterase     | gij 16767370   | 56560    | 98%  | 0    |
| hypothetical ABC transporter ATP-binding protein            | gij 16763887   | 24467.3  | 98%  | 0    |
| putative glycosyl transferase                               | gij 16765625   | 36500    | 98%  | 0    |
| citrate lyase alpha chain                                   | gij 56967225   | 54561.7  | 97%  | 0    |
| arginine-binding periplasmic protein 1 precursor            | gij 16764251   | 26979.4  | 0    | 93%  |
| cold shock-like protein cspE                                | gij 16764006   | 7433.5   | 0    | 93%  |
| outer membrane protein C                                    | gij 16765595** | 41222.1  | 0    | 93%  |
| lysine decarboxylase 2                                      | gij 16763624   | 80747.8  | 0    | 93%  |
| putative integral membrane protein                          | gij 16764196   | 59589.3  | 0    | 93%  |
| aminopeptidase B                                            | gij 16765856   | 46339    | 0    | 93%  |
| glycerate kinase II                                         | gij 16763905   | 39003.1  | 0    | 99%  |
| ecotin precursor                                            | gij 16765590   | 18199.7  | 0    | 100% |
| 3,4-dihydroxy-2-butanone 4-phosphate synthase               | gij 16766495   | 23292.3  | 0    | 86%  |
| 2-oxoglutarate dehydrogenase                                | gij 16764106   | 104805.9 | 0    | 100% |
| D-ribose-binding periplasmic protein                        | gij 16767168   | 30944.8  | 0    | 99%  |
| flagellar hook-associated protein                           | gij 16765298   | 49818.7  | 0    | 87%  |
| cysteine desulfurase                                        | gij 16765863   | 45075.7  | 0    | 83%  |
| hydrogenase-3 accessory protein                             | gij 16766161** | 31375.2  | 0    | 99%  |
| putative imidazolonepropionase or amidohydrolase            | gij 16767659   | 42408    | 0    | 100% |
| asparagine synthetase B                                     | gij 16764050   | 62555.9  | 0    | 100% |
| 50S ribosomal subunit protein L30                           | gij 16766711** | 6495.8   | 0    | 100% |
| 50S ribosomal subunit protein L23                           | gij 16766727** | 11194.9  | 0    | 100% |
| membrane-bound ATP synthase, epsilon-subunit                | gij 6625704    | 14848.1  | 0    | 100% |
| hydrogenase-2 small chain protein                           | gij 16766450   | 39604.2  | 0    | 100% |
| ATP synthase subunit C                                      | gij 16767150   | 31538    | 0    | 100% |
| precorrin-8X methylmutase                                   | gij 16765363   | 23016.8  | 0    | 99%  |
| translation initiation factor IF-2                          | gij 16766584   | 97383.5  | 0    | 99%  |
| ethanolamine ammonia-lyase heavy chain                      | gij 16765778   | 49432    | 0    | 99%  |
| putative copper-transporting ATPase                         | gij 16763878   | 87893    | 0    | 99%  |

\*Peptide samples obtained from MudPIT were analyzed using Sequest and X!Tandem software, and the data was organized using the Scaffold program. To be considered a positive identification in Scaffold, the following parameters were used: a minimum of 2 peptides from a given protein identified with peptide and protein thresholds of 80% to give an overall protein identification (ID) probability of at least 80%. Note that a protein ID probability of greater than 80% in at least one of the samples warranted inclusion in the table so as to allow identification of possible differential expression of a given protein.

\*\*Proteins identified via MuDPIT analysis as differentially expressed that also displayed differential expression via microarray analysis.
