# Supplementary material
Source: PubMed Central journal article supplement (PMC2042201)

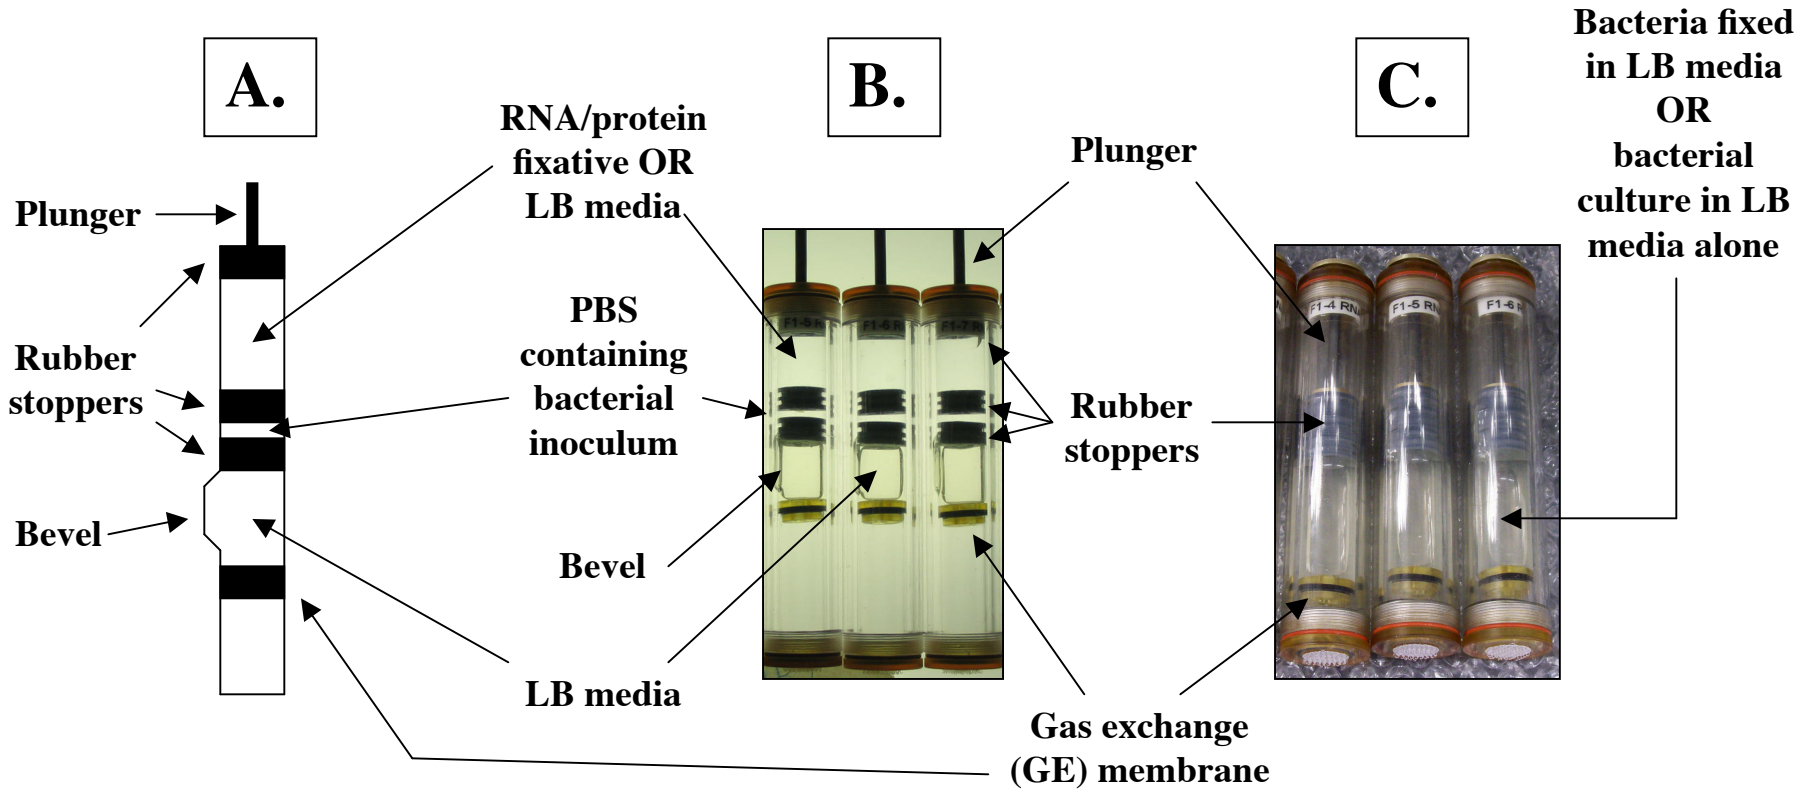

Supplement: pnas_0707155104_2.pdf [file pnas_0707155104_2.pdf]

**A.**

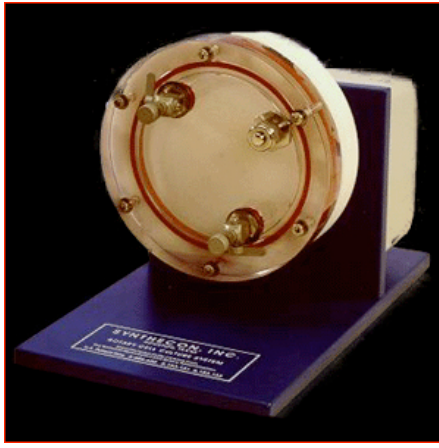

**B.**

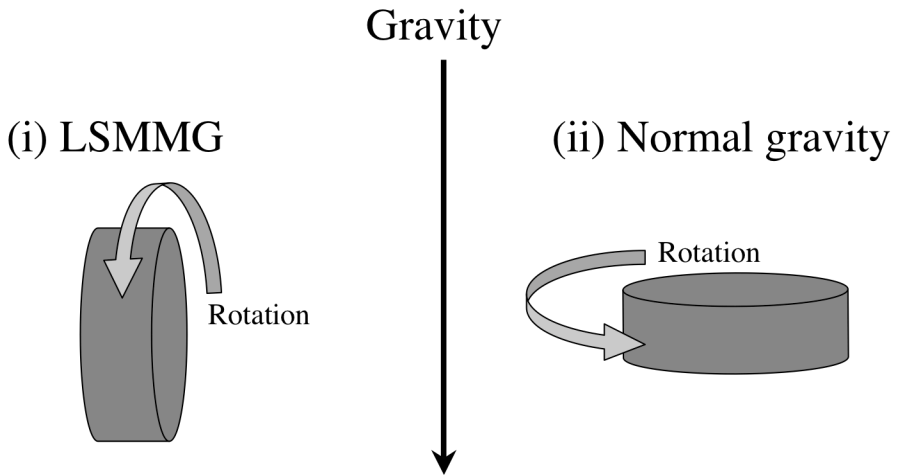

**C.**

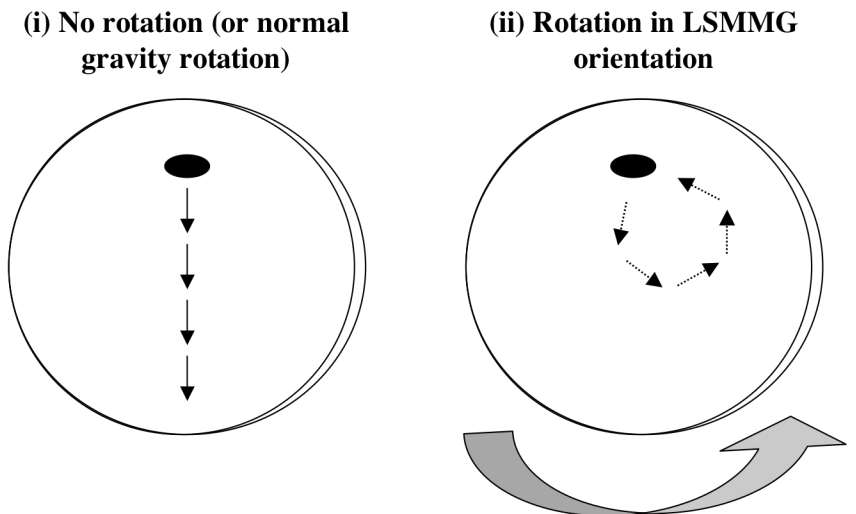

Supplement: pnas_0707155104_3.pdf [file pnas_0707155104_3.pdf]
